# Supplementary material
Source: publisher figshare collection journal article supplement (https://frontiersin.figshare.com/ndownloader/files/29051994)
Supplement: Supplementary file 1 [file 29051994]

(A)


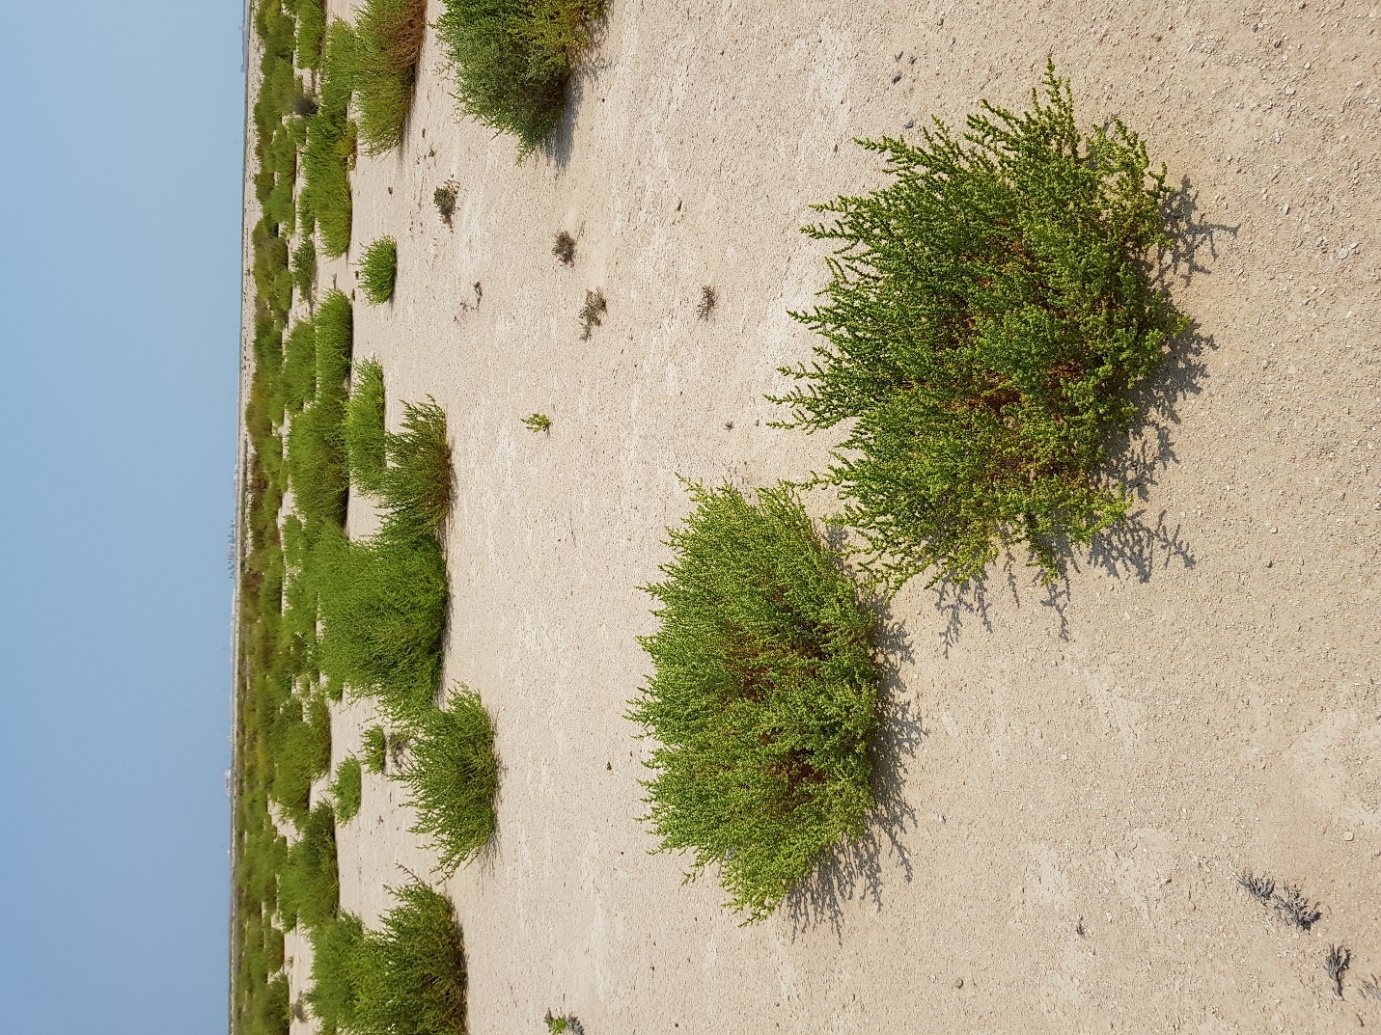


(B)

Supplementary Figure 2. Many Sabkhas and drylands scattered around Qatar are rich in halophyte and xerophyte plants. (A) Inland Sabkha, (B) Inland dry land.
